# Supplementary material for: Comparison of GenesWell BCT Score With Oncotype DX Recurrence Score for Risk Classification in Asian Women With Hormone Receptor-Positive, HER2-Negative Early Breast Cancer
Source: PubMed Central journal article supplement (PMC6670782; doi:10.3389/fonc.2019.00667), 2019-07-24
Supplement: Data_Sheet_1.pdf [file Data_Sheet_1.pdf]

## Supplementary Figures

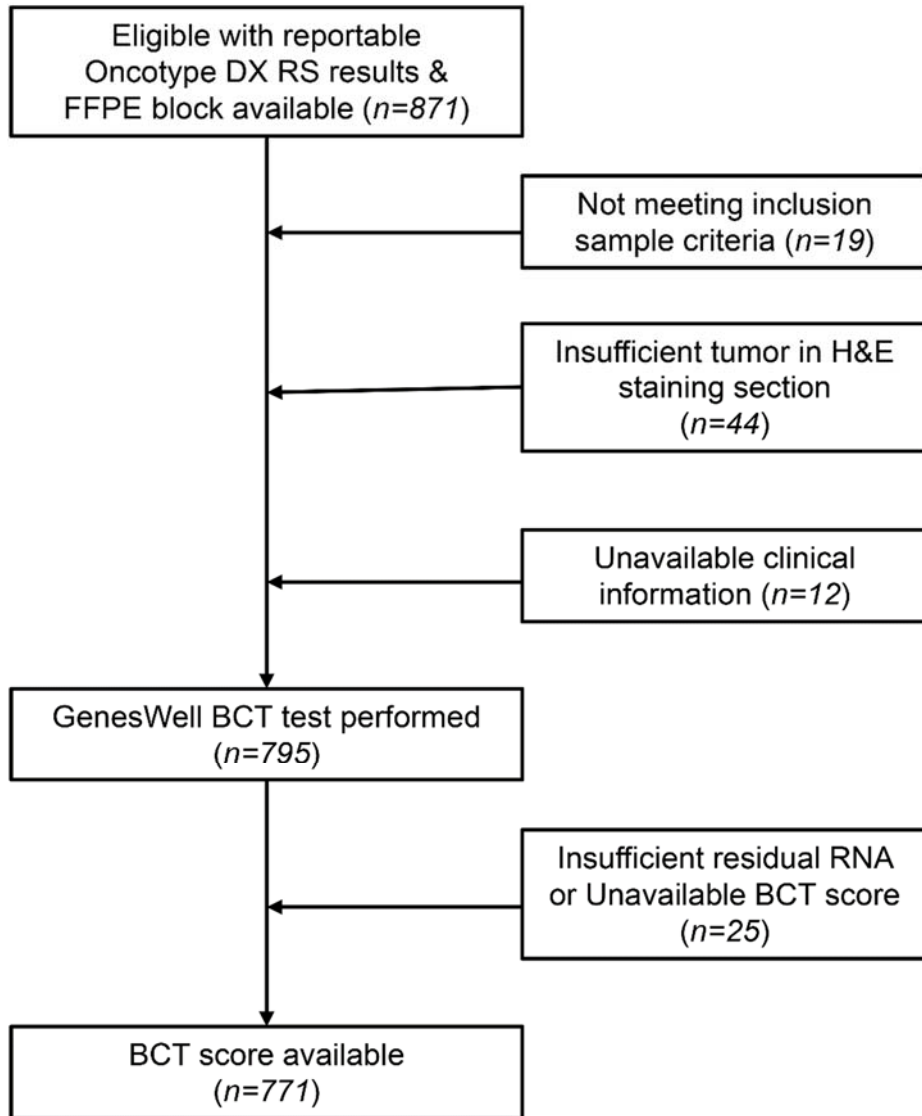

**Supplementary Figure 1.** Study diagram of the availability of samples for analysis. FFPE, formalin-fixed, paraffin-embedded; H&E, hematoxylin and eosin

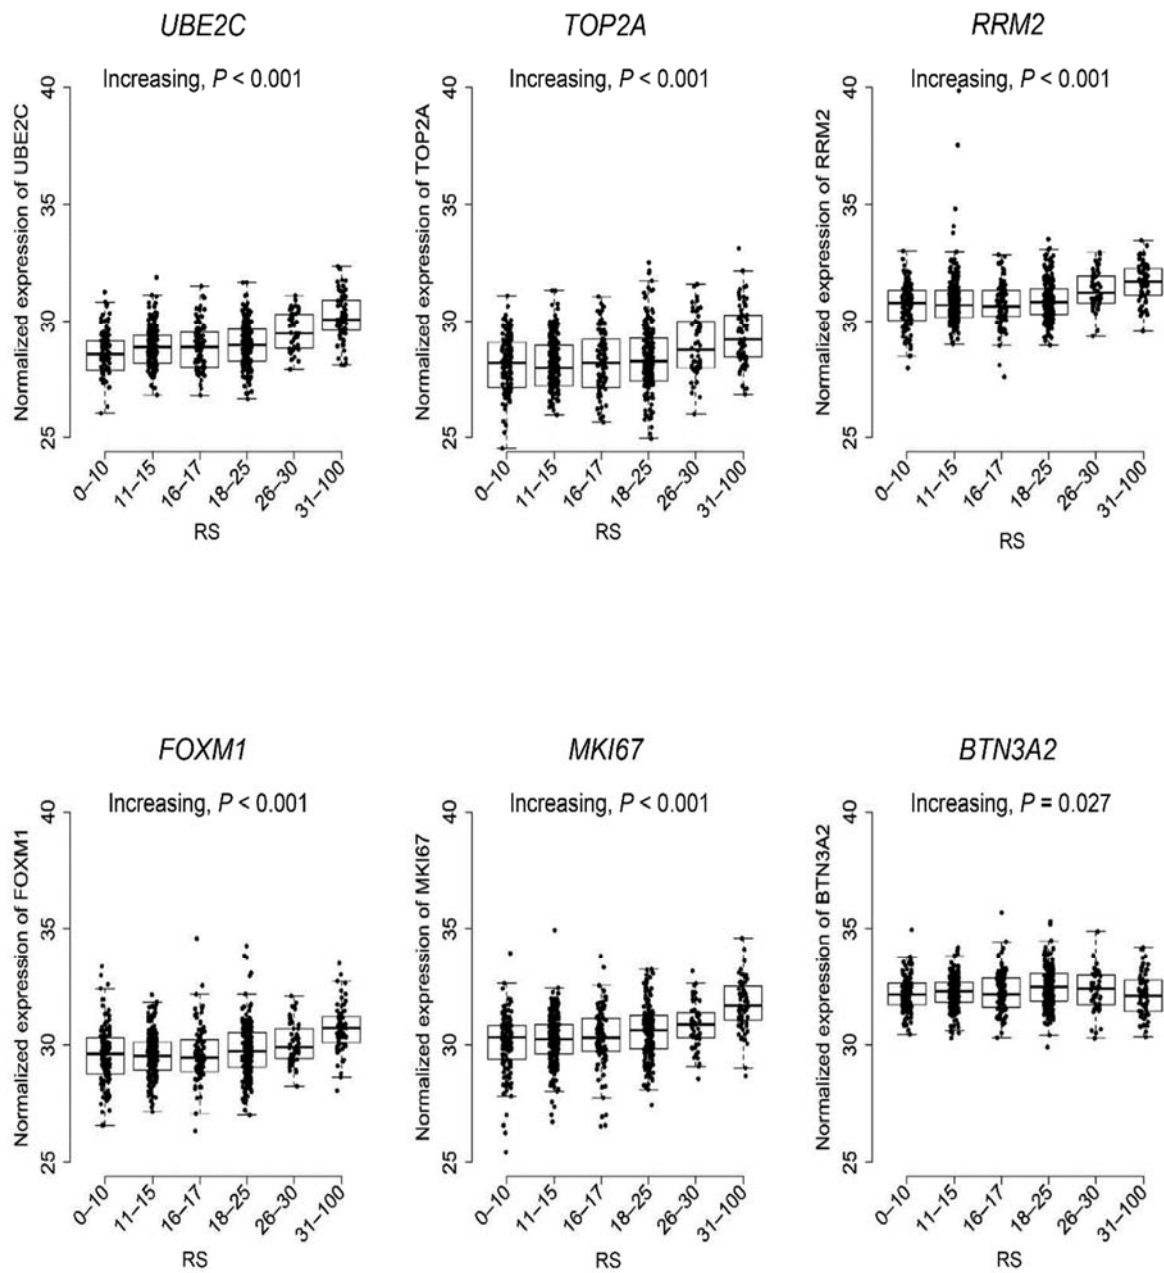

**Supplementary Figure 2.** Correlation between the expression of BCT prognostic genes and Oncotype DX RS. The expression of five proliferation-related genes (*UBE2C*, *TOP2A*, *RRM2*, *FOXM1*, and *MKI67*) and one immune response-related gene (*BTN3A2*) was determined by qRT-PCR. The Y-axis indicates the normalized gene expression value relative to three reference genes. The  $P$  value of the trend was determined using the Jonckheere-Terpstra test (one-sided).

## Supplementary Tables

**Supplementary Table 1.** Clinical characteristics of the risk groups according to the Oncotype DX RS

| Characteristics  | Oncotype DX RS (Clinical cut-off) |        |                |       |                           |       |                 |       | Oncotype DX RS (TAILORx cut-off) |                |       |                           |       |                 |       |                |  |                  |
|------------------|-----------------------------------|--------|----------------|-------|---------------------------|-------|-----------------|-------|----------------------------------|----------------|-------|---------------------------|-------|-----------------|-------|----------------|--|------------------|
|                  | All                               |        | Low risk (<18) |       | Intermediate risk (18–30) |       | High risk (≥31) |       | <i>P</i> value                   | Low risk (<11) |       | Intermediate risk (11–25) |       | High risk (≥26) |       | <i>P</i> value |  |                  |
| n, %             | 771                               |        | 441            | 57.2% | 261                       | 33.9% | 69              | 8.9%  | -                                | 134            | 17.4% | 516                       | 66.9% | 121             | 15.7% | -              |  |                  |
| Age (years)      |                                   |        |                |       |                           |       |                 |       | 0.724                            |                |       |                           |       |                 |       |                |  | 0.101            |
| ≤40              | 135                               | 17.5%  | 74             | 54.8% | 49                        | 36.3% | 12              | 8.9%  |                                  | 15             | 11.1% | 98                        | 72.6% | 22              | 16.3% |                |  |                  |
| 40–50            | 379                               | 49.2%  | 228            | 60.2% | 119                       | 31.4% | 32              | 8.4%  |                                  | 66             | 17.4% | 260                       | 68.6% | 53              | 14.0% |                |  |                  |
| 50–60            | 175                               | 22.7%  | 94             | 53.7% | 62                        | 35.4% | 19              | 10.9% |                                  | 33             | 18.9% | 107                       | 61.1% | 35              | 20.0% |                |  |                  |
| >60              | 82                                | 10.6%  | 45             | 54.9% | 31                        | 37.8% | 6               | 7.3%  |                                  | 20             | 24.4% | 51                        | 62.2% | 11              | 13.4% |                |  |                  |
| ER               |                                   |        |                |       |                           |       |                 |       | -                                |                |       |                           |       |                 |       |                |  | -                |
| Positive         | 771                               | 100.0% | 441            | 57.2% | 261                       | 33.9% | 69              | 8.9%  |                                  | 134            | 17.4% | 516                       | 66.9% | 121             | 15.7% |                |  |                  |
| PR               |                                   |        |                |       |                           |       |                 |       | <b>&lt;0.001</b>                 |                |       |                           |       |                 |       |                |  | <b>&lt;0.001</b> |
| Negative         | 78                                | 10.1%  | 25             | 32.1% | 29                        | 37.2% | 24              | 30.8% |                                  | 5              | 6.4%  | 39                        | 50.0% | 34              | 43.6% |                |  |                  |
| Positive         | 693                               | 89.9%  | 416            | 60.0% | 232                       | 33.5% | 45              | 6.5%  |                                  | 129            | 18.6% | 477                       | 68.8% | 87              | 12.6% |                |  |                  |
| Tumor size (cm)  |                                   |        |                |       |                           |       |                 |       | 0.074                            |                |       |                           |       |                 |       |                |  | <b>0.006</b>     |
| ≤2.0             | 504                               | 65.4%  | 298            | 59.1% | 169                       | 33.5% | 37              | 7.3%  |                                  | 93             | 18.5% | 347                       | 68.8% | 64              | 12.7% |                |  |                  |
| >2.0             | 267                               | 34.6%  | 143            | 53.6% | 92                        | 34.5% | 32              | 12.0% |                                  | 41             | 15.4% | 169                       | 63.3% | 57              | 21.3% |                |  |                  |
| pN               |                                   |        |                |       |                           |       |                 |       | 0.448                            |                |       |                           |       |                 |       |                |  | 0.327            |
| 0                | 619                               | 80.3%  | 349            | 56.4% | 211                       | 34.1% | 59              | 9.5%  |                                  | 105            | 17.0% | 411                       | 66.4% | 103             | 16.6% |                |  |                  |
| 1                | 152                               | 19.7%  | 92             | 60.5% | 50                        | 32.9% | 10              | 6.6%  |                                  | 29             | 19.1% | 105                       | 69.1% | 18              | 11.8% |                |  |                  |
| Histologic grade |                                   |        |                |       |                           |       |                 |       | <b>&lt;0.001</b>                 |                |       |                           |       |                 |       |                |  | <b>&lt;0.001</b> |
| 1                | 137                               | 17.8%  | 100            | 73.0% | 35                        | 25.5% | 2               | 1.5%  |                                  | 36             | 26.3% | 94                        | 68.6% | 7               | 5.1%  |                |  |                  |
| 2                | 542                               | 70.3%  | 322            | 59.4% | 185                       | 34.1% | 35              | 6.5%  |                                  | 95             | 17.5% | 378                       | 69.7% | 69              | 12.7% |                |  |                  |
| 3                | 92                                | 11.9%  | 19             | 20.7% | 41                        | 44.6% | 32              | 34.8% |                                  | 3              | 3.3%  | 44                        | 47.8% | 45              | 48.9% |                |  |                  |

|               |     |       |     |       |     |       |    |       |  |                  |       |     |       |     |                  |  |  |  |  |
|---------------|-----|-------|-----|-------|-----|-------|----|-------|--|------------------|-------|-----|-------|-----|------------------|--|--|--|--|
| Nuclear grade |     |       |     |       |     |       |    |       |  | <b>&lt;0.001</b> |       |     |       |     | <b>&lt;0.001</b> |  |  |  |  |
| 1             | 63  | 8.2%  | 44  | 69.8% | 19  | 30.2% | 0  | 0.0%  |  | 14               | 22.2% | 46  | 73.0% | 3   | 4.8%             |  |  |  |  |
| 2             | 589 | 76.4% | 356 | 60.4% | 196 | 33.3% | 37 | 6.3%  |  | 110              | 18.7% | 409 | 69.4% | 70  | 11.9%            |  |  |  |  |
| 3             | 119 | 15.4% | 41  | 34.5% | 46  | 38.7% | 32 | 26.9% |  | 10               | 8.4%  | 61  | 51.3% | 48  | 40.3%            |  |  |  |  |
| Histology     |     |       |     |       |     |       |    |       |  | 0.051            |       |     |       |     | 0.179            |  |  |  |  |
| Ductal        | 656 | 85.1% | 368 | 56.1% | 223 | 34.0% | 65 | 9.9%  |  | 113              | 17.2% | 436 | 66.5% | 107 | 16.3%            |  |  |  |  |
| Lobular       | 67  | 8.7%  | 45  | 67.2% | 22  | 32.8% | 0  | 0.0%  |  | 14               | 20.9% | 49  | 73.1% | 4   | 6.0%             |  |  |  |  |
| Mucinous      | 18  | 2.3%  | 12  | 66.7% | 6   | 33.3% | 0  | 0.0%  |  | 2                | 11.1% | 15  | 83.3% | 1   | 5.6%             |  |  |  |  |
| Others*       | 27  | 3.5%  | 16  | 59.3% | 9   | 33.3% | 2  | 7.4%  |  | 5                | 18.5% | 16  | 59.3% | 6   | 22.2%            |  |  |  |  |
| Unknown       | 3   | 0.4%  | 0   | 0.0%  | 1   | 33.3% | 2  | 66.7% |  | 0                | 0.0%  | 0   | 0.0%  | 3   | 100.0%           |  |  |  |  |

\*Cribriform, ductal carcinoma with mucinous, tubular, mixed ductal and lobular, papillary, micropapillary, and metaplastic

Abbreviations: ER, estrogen receptor; pN, pathologic nodal status; PR, progesterone receptor; RS, recurrence score; TAILORx, Trial Assigning Individualized Options for Treatment  
ER and PR status was assessed by immunohistochemistry. *P* values <0.05 are marked in bold.

**Supplementary Table 2.** Risk classification of patients with distant metastasis according to the BCT score and Oncotype DX RS

| No. | Age (years) | Pathologic information |    |                  |               |               | BCT score |            | Oncotype DX RS |                              | Treatment    |
|-----|-------------|------------------------|----|------------------|---------------|---------------|-----------|------------|----------------|------------------------------|--------------|
|     |             | Tumor size (cm)        | pN | Histologic grade | Nuclear grade | Clinical risk | BCT score | Risk group | RS             | Risk group (TAILORx cut-off) | Chemotherapy |
| 1   | 44          | 1.5                    | 0  | 2                | 2             | Low           | 2.97      | Low        | 6              | Low                          | No           |
| 2   | 57          | 1.7                    | 0  | 2                | 2             | Low           | 4.84      | High       | 32             | High                         | Yes          |
| 3   | 56          | 1.6                    | 0  | 2                | 2             | Low           | 3.51      | Low        | 28             | High                         | Yes          |
| 4   | 52          | 1.8                    | 0  | 2                | 2             | Low           | 2.57      | Low        | 18             | Intermediate                 | No           |
| 5   | 34          | 1.5                    | 0  | 3                | 3             | High          | 4.00      | High       | 49             | High                         | Yes          |
| 6   | 37          | 1.5                    | 1  | 2                | 2             | High          | 4.26      | High       | 21             | Intermediate                 | No           |
| 7   | 43          | 3.0                    | 1  | 2                | 2             | High          | 4.36      | High       | 34             | High                         | Yes          |

Abbreviations: BCT, Breast Cancer Test; pN, pathologic nodal status; RS, recurrence score; TAILORx, Trial Assigning Individualized Options for Treatment  
 Clinical risk was determined using the modified version of Adjuvant! Online as reported in the MINDACT trial.
